# Supplementary material for: The Effect of White Rice and White Bread as Staple Foods on Gut Microbiota and Host Metabolism
Source: MDPI journal article supplement (doi:10.3390/nu10091323), 2018-09-18
Supplement: s1 [file s1]

Supplemental table 1 Menu and food ingredients of the side dish sets on the 7th day of both test periods (bread and rice)

|           |                   | Menu                                                                            | Food ingredients                                                                                                                                      |
|-----------|-------------------|---------------------------------------------------------------------------------|-------------------------------------------------------------------------------------------------------------------------------------------------------|
| Breakfast | Main dish         | Chicken meatball and vegetable                                                  | Chicken, Chinese cabbage, Mushroom, Noodles made from devil's tongue starch, Green onion, Carrot, Sugar, Soy source, Seasonings (Amino acids, etc.)   |
|           | Small side dish 1 | <i>Koya-tofu</i> (freeze-dried <i>tofu</i> ) and egg simmered in seasoned broth | Onion, Egg, <i>Koya-tofu</i> , Edible clover, Sugar, Soy source, Seasonings (Amino acids, etc.)                                                       |
|           | Small side dish 2 | Okra and yam with Japanese plum paste                                           | Yam, Okra, Japanese plum paste, shavings of dried bonito, Sugar, Soy source, Seasonings (Amino acids, etc.)                                           |
| Lunch     | Main dish         | Omelet with mushroom sauce                                                      | Egg, Cheese, Tomato, Mushroom, Onion, Ketchup, Olive oil, Garlic, Sugar, Seasonings (Amino acids, etc.)                                               |
|           | Small side dish 1 | Curry flavored sautéed spinach                                                  | Spinach, Carrot, Butter flavored oil, salt, Curry powder, Pepper, Seasonings (Amino acids, etc.)                                                      |
|           | Small side dish 2 | Sweet potato salad                                                              | Sweet potato, Almond, Sugar, Honey, Flavors                                                                                                           |
| Dinner    | Main dish         | Cod fish with Ratatouille sauce                                                 | Cod fish, Tomato, Zucchini, White wine, Spanish paprika, Onion, Celery, Carrot, Olive oil, Milk, Salt, Pepper, Garlic, Seasonings (Amino acids, etc.) |
|           | Small side dish 1 | Sauteed soybean sprouts and Japanese mustard spinach                            | Japanese mustard spinach, Soybean sprouts, Carrot, <i>Miso</i> paste, Sugar, Soy source, Seasonings (Amino acids, etc.)                               |
|           | Small side dish 2 | Curry flavored boiled potato                                                    | Potato, Carrot, Sugar, Pea Honey, Curry powder, Soy source, Salt, Seasonings (Amino acids, etc.)                                                      |
